# Supplementary material
Source: PubMed Central journal article supplement (PMC6495353)
Supplement: jamapsychiatry-76-508-s001.pdf [file jamapsychiatry-76-508-s001.pdf]

## Supplementary Online Content

Stroup TS, Gerhard T, Crystal S, et al. Comparative effectiveness of adjunctive psychotropic medications in patients with schizophrenia. *JAMA Psychiatry*. Published online February 20, 2019. doi:10.1001/jamapsychiatry.2018.4489

**eTable 1.** Outcome Measures

**eTable 2.** Covariates Included in Propensity Score Calculation

**eTable 3.** Treatment Medications and Deaths

**eTable 4.** Effectiveness and Mortality Outcomes (Episodes\*)

This supplementary material has been provided by the authors to give readers additional information about their work.

| <b>eTable 1. Outcome Measures</b>                   |                                                                                                                                                                                                                                                                                                                                                                                                                                                                                                                                             |
|-----------------------------------------------------|---------------------------------------------------------------------------------------------------------------------------------------------------------------------------------------------------------------------------------------------------------------------------------------------------------------------------------------------------------------------------------------------------------------------------------------------------------------------------------------------------------------------------------------------|
| Inpatient Psychiatric admission                     | Inpatient admissions with a first listed mental disorder diagnosis (ICD-9:290-319).                                                                                                                                                                                                                                                                                                                                                                                                                                                         |
| Emergency Department visit for mental health reason | Emergency department visits in which the first listed diagnosis is a mental disorder (ICD-9-CM: 290-319).                                                                                                                                                                                                                                                                                                                                                                                                                                   |
| Self-Injurious Behavior                             | Defined by an E-code of E950-E958, excluding late effects of deliberate self-harm (E959), on any inpatient, emergency department, or outpatient claim.                                                                                                                                                                                                                                                                                                                                                                                      |
| Mortality                                           | Date of death defined by the MAX Date of Death File (MAX DOD) which is auxiliary to the CMS Medicaid Analytic Extract (MAX). The MAX DOD File was constructed from the Social Security Death Master File.                                                                                                                                                                                                                                                                                                                                   |
| Admission for Cardiovascular disease                | Defined by first listed diagnosis of acute myocardial infarction (AMI) (ICD-9-CM: 410) or stroke (430-438, except 435) on inpatient claims.                                                                                                                                                                                                                                                                                                                                                                                                 |
| Diabetes                                            | <p>Defined by the Mini-Sentinel Algorithm for Type 2 diabetes</p> <ul style="list-style-type: none"> <li>a. 1+ inpatient claims with primary or secondary ICD-9 codes 250.XX, 357.2, 362.01-362.07, 366.41, OR</li> <li>b. 2+ outpatient claims on separate dates with any listed ICD-9 codes 250.XX, 357.2, 362.01-362.07, 366.41, OR</li> <li>c. 2+ prescriptions for an antidiabetic medication (two dispensing of metformin or two dispensings of thiazolidinediones with no other indication of diabetes were not included)</li> </ul> |

| eTable 2. Covariates included in Propensity Score Calculation                              |
|--------------------------------------------------------------------------------------------|
| 1. Year of initiating treatment augmentation                                               |
| 2. Male                                                                                    |
| 3. Female                                                                                  |
| 4. Medicaid eligibility: Low income                                                        |
| 5. Medicaid eligibility: Disability                                                        |
| 6. Medicaid eligibility: Others                                                            |
| 7. Age at index: 18-21                                                                     |
| 8. Age at index: 22-25                                                                     |
| 9. Age at index: 26-29                                                                     |
| 10. Age at index: 30-33                                                                    |
| 11. Age at index: 34-37                                                                    |
| 12. Age at index: 38-41                                                                    |
| 13. Age at index: 42-45                                                                    |
| 14. Age at index: 46-49                                                                    |
| 15. Age at index: 50-53                                                                    |
| 16. Age at index: 54-57                                                                    |
| 17. Age at index: 58-61                                                                    |
| 18. Age at index: 62-64                                                                    |
| 19. Race: White, non-Hispanic                                                              |
| 20. Race: Black, non-Hispanic                                                              |
| 21. Race: Hispanic or Latino                                                               |
| 22. Race: Asian                                                                            |
| 23. Race: Hawaiian or Pacific Islander                                                     |
| 24. Race: Native American or Alaskan Native                                                |
| 25. Race: More than one race                                                               |
| 26. Race: Unknown                                                                          |
| 27. Prescriptions for ADHD medication filled during the baseline period                    |
| 28. Prescriptions for for antibiotics filled during the baseline period                    |
| 29. Prescriptions for antidepressants filled during the baseline period                    |
| 30. Prescriptions for benzodiazepine filled during the baseline period                     |
| 31. Prescriptions for cardiovascular disease filled during the baseline period             |
| 32. Prescriptions for antidiabetics filled during the baseline period                      |
| 33. Prescriptions for GI disease filled during the baseline period                         |
| 34. Prescriptions for hyperlipidemia filled during the baseline period                     |
| 35. Prescriptions for metabolic medication filled during the baseline period               |
| 36. Prescriptions for mood stabilizer filled during the baseline period                    |
| 37. Prescriptions for Neurologic/Musculoskeletal disease filled during the baseline period |
| 38. Prescriptions for non-benzo anxiolytic/hypnotics filled during the baseline            |

|                                                                                          |
|------------------------------------------------------------------------------------------|
| 39. Prescriptions for OBGYN disease filled during the baseline                           |
| 40. Prescriptions for other psychiatric medications filled during the baseline           |
| 41. Prescriptions for any psychotropic medication filled during the baseline             |
| 42. Prescriptions for respiratory disease filled during the baseline period              |
| 43. Diagnosis of acute bronchitis received during the baseline period                    |
| 44. Diagnosis of anemias received during the baseline period                             |
| 45. Diagnosis of anxiety received during the baseline period                             |
| 46. Diagnosis of appendicitis received during the baseline period                        |
| 47. Diagnosis of asthma received during the baseline period                              |
| 48. Diagnosis of bipolar received during the baseline period                             |
| 49. Diagnosis of white blood cells disorder received during the baseline period          |
| 50. Diagnosis of cellulitis and abscess received during the baseline period              |
| 51. Diagnosis of cerebrovascular disease received during the baseline period             |
| 52. Diagnosis of cholelithiasis received during the baseline period                      |
| 53. Diagnosis of chronic bronchitis received during the baseline period                  |
| 54. Diagnosis of liver disease received during the baseline period                       |
| 55. Diagnosis of depression received during the baseline period                          |
| 56. Diagnosis of diabetes received during the baseline period                            |
| 57. Diagnosis of intervertebral disc disorder received during the baseline period        |
| 58. Diagnosis of dysrhythmias received during the baseline period                        |
| 59. Diagnosis of dyskinesia received during the baseline period                          |
| 60. Diagnosis of emphysema received during the baseline period                           |
| 61. Diagnosis of noninfectious enteritis and colitis received during the baseline period |
| 62. Diagnosis of fracture of neck received during the baseline period                    |
| 63. Diagnosis of fracture received during the baseline period                            |
| 64. Diagnosis of heart failure received during the baseline period                       |
| 65. Diagnosis of HIV received during the baseline period                                 |
| 66. Diagnosis of hyperlipidemia received during the baseline period                      |
| 67. Diagnosis of hypertension received during the baseline period                        |
| 68. Diagnosis of injury received during the baseline period                              |
| 69. Diagnosis of diverticula of intestine received during the baseline period            |
| 70. Diagnosis of intestinal obstruction received during the baseline period              |
| 71. Diagnosis of ischemic heart disease received during the baseline period              |
| 72. Diagnosis of acute kidney failure received during the baseline period                |
| 73. Diagnosis of chronic kidney failure received during the baseline period              |
| 74. Diagnosis of kidney infection received during the baseline period                    |
| 75. Diagnosis of obesity infection received during the baseline period                   |
| 76. Diagnosis of osteoarthritis received during the baseline period                      |
| 77. Diagnosis of other neoplasms received during the baseline period                     |
| 78. Diagnosis of pancreatitis received during the baseline period                        |
| 79. Diagnosis of pneumonia received during the baseline period                           |

|                                                                                                                               |
|-------------------------------------------------------------------------------------------------------------------------------|
| 80. Diagnosis of all poisonings received during the baseline period                                                           |
| 81. Diagnosis of poisoning by psychotropic medication received during the baseline period                                     |
| 82. Diagnosis of pulmonary circulation received during the baseline period                                                    |
| 83. Diagnosis of mental retardation received during the baseline period                                                       |
| 84. Diagnosis of sever cardiovascular disease received during the baseline period                                             |
| 85. Diagnosis of suicide received during the baseline period                                                                  |
| 86. Diagnosis of substance disorder received during the baseline period                                                       |
| 87. Diagnosis of schizoaffective disorder received during the baseline period                                                 |
| 88. Diagnosis of schizophreniform disorder received during the baseline period                                                |
| 89. Number of hospitalizations for primary diagnosis of non-mental health disorders during the baseline period                |
| 90. Number of hospitalizations for primary diagnosis of mental health disorders during the baseline period                    |
| 91. Number of outpatient visits for primary diagnosis of non-mental health disorders during the baseline period               |
| 92. Number of outpatient visits for primary diagnosis of mental disorders other than schizophrenia during the baseline period |
| 93. Number of outpatient visits for primary diagnosis of schizophrenia during the baseline period                             |
| 94. Number of outpatient ER visits for primary diagnosis of non-mental health disorders during the baseline period            |
| 95. Outpatient ER visits for primary diagnosis of mental disorder during the baseline period                                  |
| 96. Psychosocial Service contacts during the baseline period                                                                  |
| 97. Psychotherapy during the baseline period                                                                                  |

| <b>eTable 3. Treatment Medications and Deaths</b> |               |                         |                             |                        |
|---------------------------------------------------|---------------|-------------------------|-----------------------------|------------------------|
| <b>Generic</b>                                    | <b>Total</b>  | <b>Percent by class</b> | <b>Death in 365-day ITT</b> | <b>% death by drug</b> |
| <b>ANTIPSYCHOTICS</b>                             | <b>26,014</b> |                         | <b>259</b>                  | <b>1.00%</b>           |
| ARIPRAZOLE                                        | 6,194         | 23.81%                  | 59                          | 0.95%                  |
| ASENAPINE                                         | 92            | 0.35%                   | 0                           | 0.00%                  |
| ILOPERIDONE                                       | 64            | 0.25%                   | 0                           | 0.00%                  |
| OLANZAPINE                                        | 4,095         | 15.74%                  | 45                          | 1.10%                  |
| PALIPERIDONE                                      | 722           | 2.78%                   | 6                           | 0.83%                  |
| QUETIAPINE                                        | 5,814         | 22.35%                  | 65                          | 1.12%                  |
| RISPERIDONE                                       | 5,569         | 21.41%                  | 57                          | 1.02%                  |
| ZIPRASIDONE                                       | 3,464         | 13.32%                  | 27                          | 0.78%                  |
| TOTAL                                             |               | 100.00%                 |                             |                        |
|                                                   |               |                         |                             |                        |
| <b>MOOD STABILIZERS</b>                           | <b>12,849</b> |                         | <b>161</b>                  | <b>1.25%</b>           |
| CARBAMAZEPINE                                     | 493           | 3.84%                   | 4                           | 0.81%                  |
| DIVALPROEX                                        | 6,486         | 50.48%                  | 61                          | 0.94%                  |
| GABAPENTIN                                        | 1,755         | 13.66%                  | 45                          | 2.56%                  |
| LAMOTRIGINE                                       | 700           | 5.45%                   | 4                           | 0.57%                  |
| LITHIUM                                           | 1,228         | 9.56%                   | 13                          | 1.06%                  |
| OXCARBAZEPINE                                     | 777           | 6.05%                   | 10                          | 1.29%                  |
| TOPIRAMATE                                        | 1,082         | 8.42%                   | 17                          | 1.57%                  |
| VALPROATE                                         | 159           | 1.24%                   | 5                           | 3.14%                  |
| VALPROIC                                          | 169           | 1.32%                   | 2                           | 1.18%                  |
| TOTAL                                             |               | 100.00%                 |                             |                        |
|                                                   |               |                         |                             |                        |
| <b>ANTIDEPRESSANTS</b>                            | <b>31,117</b> |                         | <b>327</b>                  | <b>1.05%</b>           |
| AMITRIPTYLINE                                     | 792           | 2.55%                   | 14                          | 1.77%                  |
| AMOXAPINE                                         | 10            | 0.03%                   | 1                           | 10.00%                 |
| BUPROPION                                         | 3,300         | 10.61%                  | 26                          | 0.79%                  |
| CITALOPRAM                                        | 2,725         | 8.76%                   | 24                          | 0.88%                  |
| CLOMIPRAMINE                                      | 59            | 0.19%                   | 0                           | 0.00%                  |
| DESIPRAMINE                                       | 39            | 0.13%                   | 0                           | 0.00%                  |
| DESVENLAFAXINE                                    | 55            | 0.18%                   | 0                           | 0.00%                  |
| DOXEPIN                                           | 376           | 1.21%                   | 1                           | 0.27%                  |
| DULOXETINE                                        | 477           | 1.53%                   | 7                           | 1.47%                  |
| ESCITALOPRAM                                      | 3,569         | 11.47%                  | 36                          | 1.01%                  |
| FLUOXETINE                                        | 3,229         | 10.38%                  | 29                          | 0.90%                  |
| FLUVOXAMINE                                       | 193           | 0.62%                   | 1                           | 0.52%                  |
| IMIPRAMINE                                        | 128           | 0.41%                   | 1                           | 0.78%                  |
| MAPROTILINE                                       | 2             | 0.01%                   | 0                           | 0.00%                  |

|                        |               |         |            |              |
|------------------------|---------------|---------|------------|--------------|
| MIRTAZAPINE            | 1,553         | 4.99%   | 32         | 2.06%        |
| NEFAZODONE             | 89            | 0.29%   | 1          | 1.12%        |
| NORTRIPTYLINE          | 146           | 0.47%   | 0          | 0.00%        |
| PAROXETINE             | 2,550         | 8.19%   | 27         | 1.06%        |
| PROTRIPTYLINE          | 6             | 0.02%   | 0          | 0.00%        |
| SERTRALINE             | 4,258         | 13.68%  | 40         | 0.94%        |
| TRAZODONE              | 6,431         | 20.67%  | 74         | 1.15%        |
| TRIMIPRAMINE           | 2             | 0.01%   | 0          | 0.00%        |
| VENLAFAXINE            | 1,135         | 3.65%   | 13         | 1.15%        |
| TOTAL                  |               | 100.00% |            |              |
|                        |               |         |            |              |
| <b>BENZODIAZEPINES</b> | <b>11,941</b> |         | <b>204</b> | <b>1.71%</b> |
| ALPRAZOLAM             | 1,068         | 8.94%   | 22         | 2.06%        |
| CHLORDIAZEPOXIDE       | 103           | 0.86%   | 4          | 3.88%        |
| CLONAZEPAM             | 3,168         | 26.53%  | 46         | 1.45%        |
| CLORAZEPATE            | 39            | 0.33%   | 0          | 0.00%        |
| DIAZEPAM               | 855           | 7.16%   | 16         | 1.87%        |
| ESTAZOLAM              | 11            | 0.09%   | 0          | 0.00%        |
| FLURAZEPAM             | 179           | 1.50%   | 2          | 1.12%        |
| LORAZEPAM              | 5,283         | 44.24%  | 95         | 1.80%        |
| OXAZEPAM               | 36            | 0.30%   | 0          | 0.00%        |
| QUAZEPAM               | 1             | 0.01%   | 0          | 0.00%        |
| TEMAZEPAM              | 1,122         | 9.40%   | 17         | 1.52%        |
| TRIAZOLAM              | 69            | 0.58%   | 2          | 2.90%        |
| TOTAL                  |               | 100.00% |            |              |
|                        |               |         |            |              |
| <b>TOTAL</b>           | <b>81,921</b> |         | <b>951</b> |              |

| eTable 4. Effectiveness and Mortality Outcomes (Episodes*) N = 103,858 |                                    |      |                                      |                              |      |                       |           |                              |      |                       |             |                               |      |                       |             |
|------------------------------------------------------------------------|------------------------------------|------|--------------------------------------|------------------------------|------|-----------------------|-----------|------------------------------|------|-----------------------|-------------|-------------------------------|------|-----------------------|-------------|
|                                                                        | Second Antipsychotic<br>N=33,307   |      |                                      | Antidepressant<br>N=38,550   |      |                       |           | Benzodiazepine<br>N=16,059   |      |                       |             | Mood Stabilizer<br>N=15,942   |      |                       |             |
|                                                                        | N                                  | %    | Adjusted Hazard Ratio<br>(Reference) | N                            | %    | Adjusted Hazard Ratio | 95% CI    | N                            | %    | Adjusted Hazard Ratio | 95% CI      | N                             | %    | Adjusted Hazard Ratio | 95% CI      |
| Inpatient psychiatric admission                                        | 6,475                              | 19.4 | 1.0                                  | 6,546                        | 17.0 | 0.85                  | 0.81-0.88 | 3,136                        | 19.5 | 1.08                  | 1.02-1.13   | 3,894                         | 24.4 | 1.01                  | 0.97-1.06   |
| Emergency Department visit for mental health reason                    | 7,275                              | 21.8 | 1.0                                  | 8,182                        | 21.2 | 0.92                  | 0.89-0.95 | 3,947                        | 24.6 | 1.12                  | 1.07-1.17   | 4,357                         | 27.3 | 1.00                  | 0.96-1.05   |
| Self-injurious behavior                                                | 106                                | 0.3  | 1.0                                  | 159                          | 0.4  | 0.97                  | 0.73-1.28 | 61                           | 0.4  | 1.01                  | (0.83-1.24) | 70                            | 0.4  | 1.03                  | (0.71-1.50) |
| Mortality                                                              | 332                                | 1.0  | 1.0                                  | 409                          | 1.1  | 1.00                  | 0.85-1.18 | 256                          | 1.6  | 1.17                  | 0.97-1.42   | 206                           | 1.3  | 1.33                  | (1.09-1.63) |
| Admissions for cardiovascular disease                                  | 88                                 | 0.3  | 1.0                                  | 130                          | 0.3  | 1.28                  | 0.95-1.73 | 53                           | 0.3  | 1.16                  | 0.76-1.79   | 54                            | 0.3  | 1.41                  | 0.92-2.16   |
|                                                                        | Second Antipsychotic<br>N=27,523** |      |                                      | Antidepressant<br>N=31,953** |      |                       |           | Benzodiazepine<br>N=12,934** |      |                       |             | Mood Stabilizer<br>N=12,963** |      |                       |             |
| Diabetes                                                               | 1,220                              | 4.4  | 1.0                                  | 1,259                        | 3.9  | 0.88                  | 0.81-0.96 | 584                          | 4.5  | 0.98                  | 0.87-1.10   | 531                           | 4.1  | 1.00                  | 0.89-1.13   |

\*Individuals were allowed to have more than one treatment episode if qualifying new treatment initiations occurred >365 days apart.

\*\*Those with diagnosis of diabetes during the baseline period were excluded.
